# Supplementary material
Source: PubMed Central journal article supplement (PMC5303042)
Supplement: SD6.pdf [file SD6.pdf]

SUPPLEMENTAL TABLE 1  
A primer list for 3'-end RACE PCR of HTNV

| Segment | PCR   | Name      | Sequence (5' → 3')     | Polarity | Temperature (°C) | Note |
|---------|-------|-----------|------------------------|----------|------------------|------|
| S       | First | HTN-S612R | TCTTCTGCCTTCATACTTGA   | –        | 51.3             |      |
| M       | First | HTN-M575R | CTCCTGTCATGCAATAGGTTCT | –        | 56.4             |      |
| L       | First | HTN-L717R | ATGTAATATGGCTGGCTTT    | –        | 48.7             |      |

HTNV = Hantaan virus; RACE PCR = rapid amplification cDNA ends polymerase chain reaction.

SUPPLEMENTAL TABLE 2  
A primer list for 5'-end RACE PCR of HTNV

| Segment | PCR    | Name         | Sequence (5' → 3')    | Polarity | Temperature (°C) | Note                  |
|---------|--------|--------------|-----------------------|----------|------------------|-----------------------|
| S       | cDNA   | HTN-S596F-P  | (P)-GTATGAAGGCAGAAG   | +        | 48.1             | 5'-end phosphorylated |
| M       |        | HTN-M2624F-P | (P)-TGGTGCACATCCACA   | +        | 50.8             | 5'-end phosphorylated |
| L       |        | HTN-L5486F-P | (P)-GTCTTAAGGACAAGC   | +        | 48.1             | 5'-end phosphorylated |
| S       | First  | HTN-S1240F   | ATGGATCCTGAGCTAAGAAC  | +        | 53.4             |                       |
|         |        | HTN-S867R    | TCCATATTGCCTAATGCCACT | –        | 54.1             |                       |
|         | Nested | HTN-S1292F   | AGGAAATCTCCAACCAAGA   | +        | 51.1             |                       |
|         |        | HTN-S743R    | ATACGATCACTCCAATCCT   | –        | 51.1             |                       |
|         |        | HTN-M3083F   | TGTTACGGTGCAGAGAGTGTA | +        | 56.2             |                       |
| M       | First  | HTN-M2877R   | CCATCAGGGTCTTTCCACT   | –        | 55.2             |                       |
|         |        | HTN-M3277F   | TGATGGAGCACCGCAATG    | +        | 54.4             |                       |
|         | Nested | HTN-M2778R   | CCTGAGACCATATTTCCGTCA | –        | 56.2             |                       |
|         |        | HTN-L6162F   | GGGTATCACGTGGATTATC   | +        | 53.2             |                       |
|         |        | HTN-L5937R   | TCAGACCATAATCGGCTTGAC | –        | 56.2             |                       |
| L       | First  | HTN-L6250F   | GAGTACCAAACAGGTCTCATT | +        | 54.1             |                       |
|         |        | HTN-L5760R   | ATTGCAGCTGGAAGATTCT   | –        | 51.1             |                       |

HTNV = Hantaan virus; RACE PCR = rapid amplification cDNA ends polymerase chain reaction.
